# Supplementary material for: Small size Mo2C nanocrystal coupled with reduced graphene oxide enhance the electrochemical activity of palladium nanoparticles towards methanol oxidation reaction
Source: Royal Society of Chemistry journal article supplement (doi:10.1039/c6cy01299j), 2016-01-01
Supplement: c6cy01299j1.pdf [file c6cy01299j1.pdf]

## Supporting Information

### **Small size Mo<sub>2</sub>C nanocrystals coupled with reduced graphene oxide enhance the electrochemical activity of palladium nanoparticles towards methanol oxidation reaction**

*Chunyong He<sup>\*a,b</sup>, Juzhou Tao<sup>\*a,b</sup>, Guoqiang He<sup>c</sup> Pei Kang Shen<sup>\*c</sup> Yongfu Qiu<sup>d</sup>*

<sup>a</sup> Institute of High Energy Physics, Chinese Academy of Sciences (CAS), Beijing 100049, China

<sup>b</sup> Dongguan Neutron Science Center, Dongguan 523803, China

<sup>c</sup> Collaborative Innovation Center of Sustainable Energy Materials, Guangxi University, Nanning, Guangxi, 530004, PR China

<sup>d</sup> College of Chemistry and Environmental Engineering, Dongguan University of Technology, Guangdong 523808, P. R. China

E-mail: taoj@ihep.ac.cn; hechunyong@ihep.ac.cn; pkshen@gxu.edu.cn

**Keywords:** Small size, Mo<sub>2</sub>C nanocrystals, Electrocatalyst, Methanol Oxidation Reaction, Direct Methanol Fuel Cells

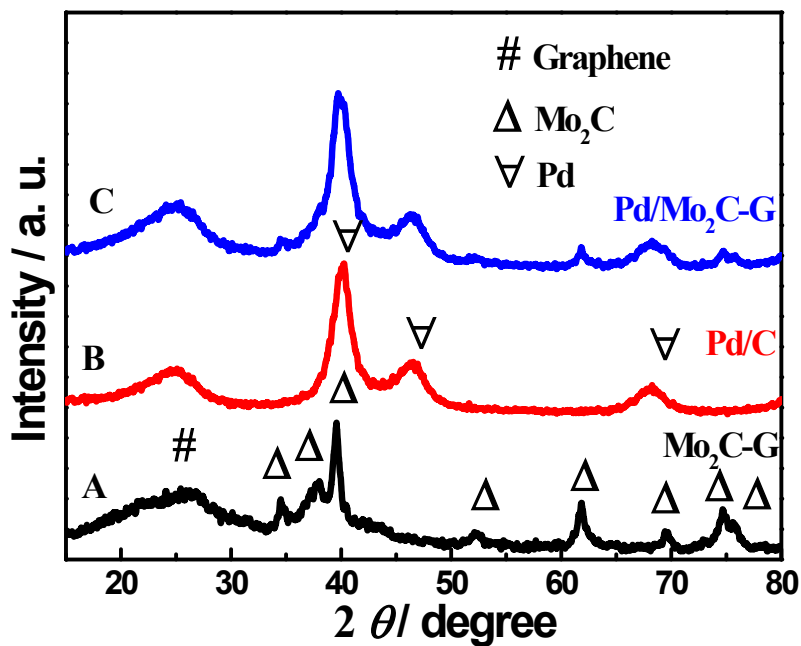

Figure S1 The XRD pattern of Mo<sub>2</sub>C-RGO, Pd/C and Pd/Mo<sub>2</sub>C-RGO.

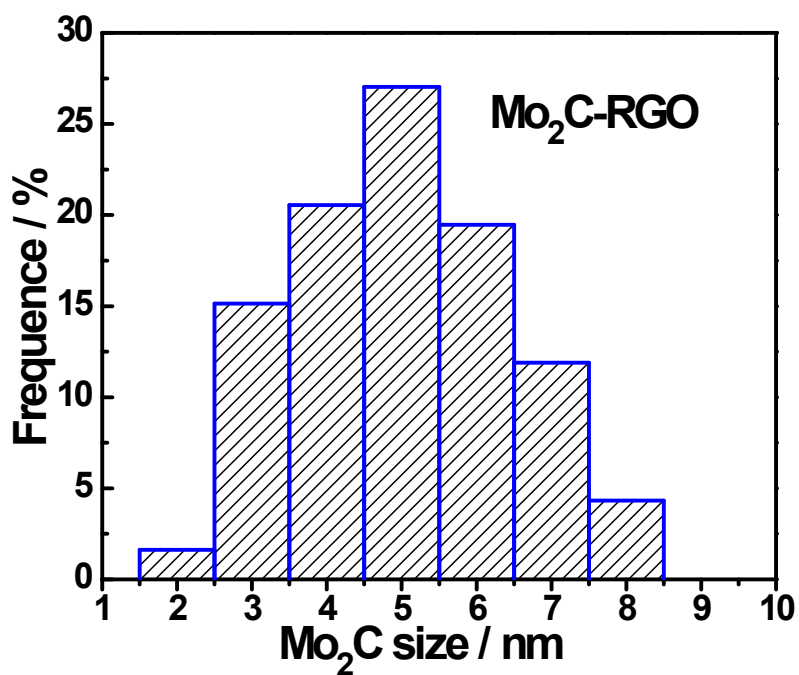

Figure S2 Size-distribution histograms of the Mo<sub>2</sub>C-RGO nanosheets.

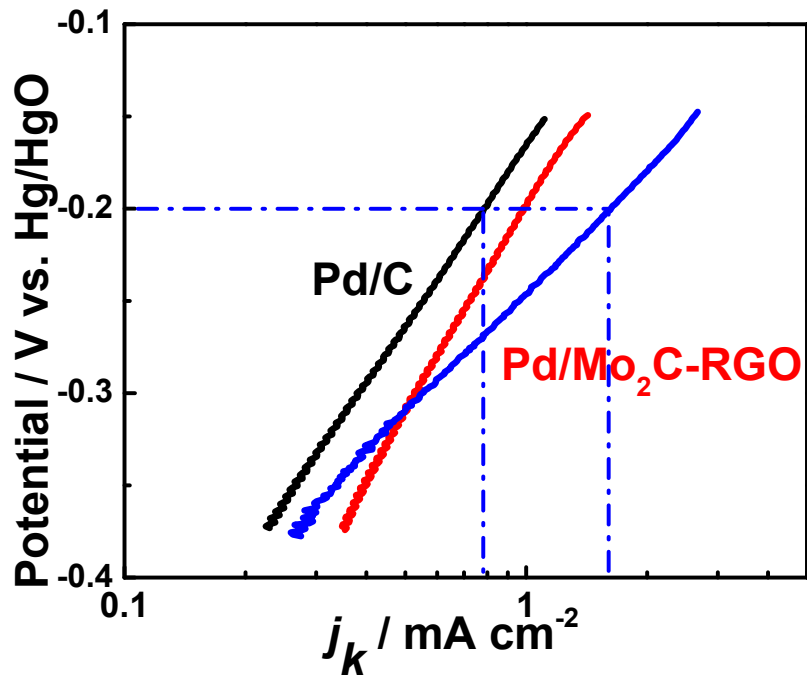

**Figure S3** The comparison of specific activities ( $j_k$ ) of Pd/C and Pd/Mo<sub>2</sub>C-RGO. The Pd/Mo<sub>2</sub>C-RGO (1.59 mA cm<sup>-2</sup>) exhibits about twice enhancement in specific activity compared to the Pd/C (0.78 mA cm<sup>-2</sup>), and 1.6 time of Pd/G (0.98 mA cm<sup>-2</sup>) at -0.2 V (vs. Hg/HgO).

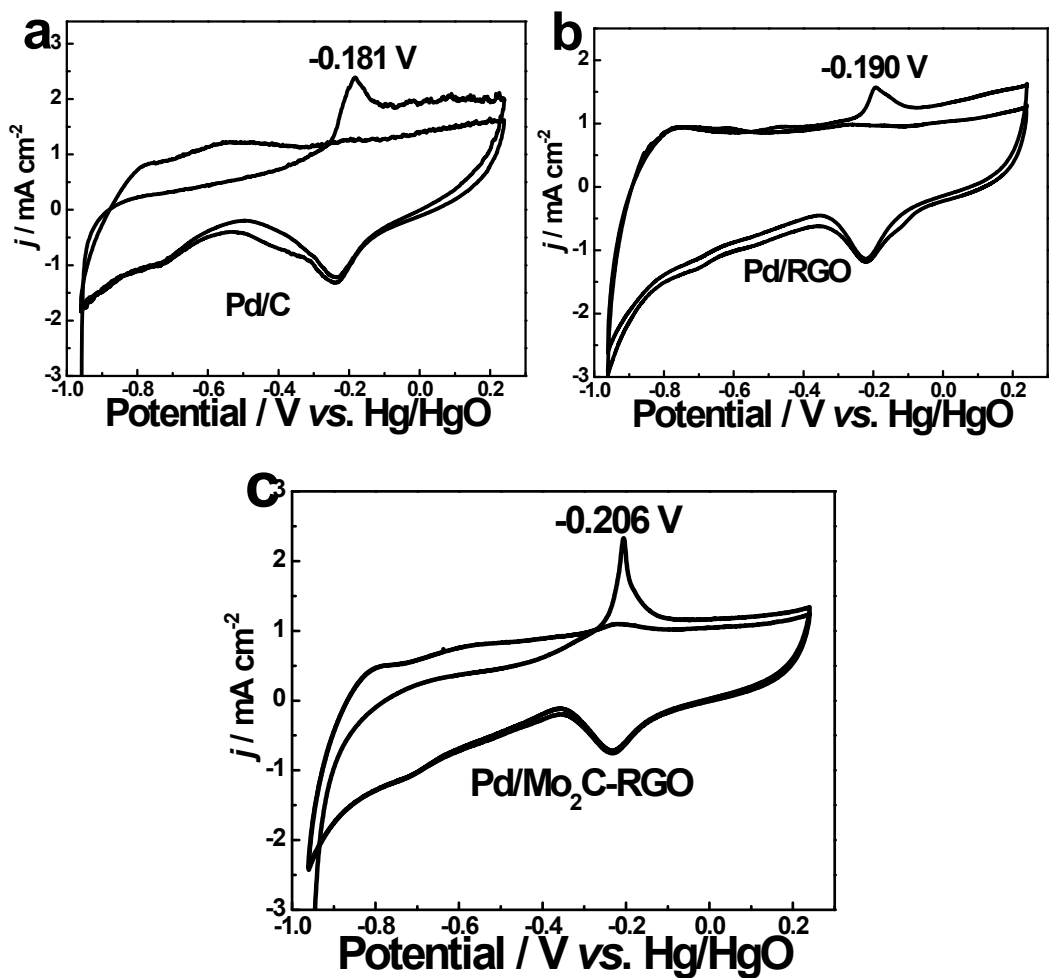

**Fig. S4** CO-stripping of Pd/C (a), Pd/RGO (b) and Pd/Mo<sub>2</sub>C-RGO (c) in 1.0 mol L<sup>-1</sup> KOH solution.

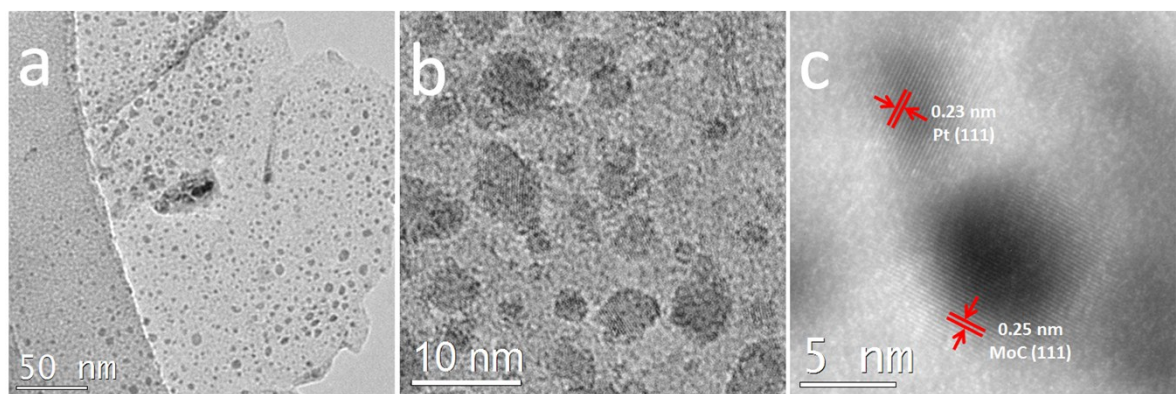

**Fig. S5** (a,b) TEM images of Pd/Mo<sub>2</sub>C-RGO after ADT test (2000 cycles), (c) HRTEM image of Pd/Mo<sub>2</sub>C-RGO after stability test.
